# Supplementary material for: Fully printable transparent monolithic solid-state dye-sensitized solar cell with mesoscopic indium tin oxide counter electrode
Source: Royal Society of Chemistry journal article supplement (doi:10.1039/c4cp02354d), 2014-01-01
Supplement: c4cp02354d1.pdf [file c4cp02354d1.pdf]

**Supporting Information For**

**Fully printable transparent monolithic solid-state  
dye-sensitized solar cell with mesoscopic indium tin  
oxide counter electrode**

*Ying Yang, Kwangho Ri, Yaoguang Rong, Lingfeng Liu, Min Hu, Tongfa Liu, Xiong Li and  
Hongwei Han\**

*Michael Grätzel Center for Mesoscopic Solar Cells, Wuhan National Laboratory for  
Optoelectronics, School of Optical and Electronic Information, Huazhong University of Science  
and Technology, Wuhan, P. R. China*

*E-mail: [hongwei.han@mail.hust.edu.cn](mailto:hongwei.han@mail.hust.edu.cn);*

*Fax: +86 027 877 930 27; Tel: +86 027 877 930 27*

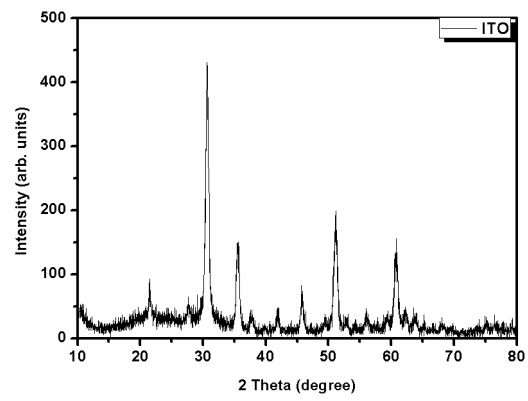

**Figure S1** XRD pattern of ITO nanoparticles.
